# Supplementary material
Source: HighWire-hosted journal article supplement (https://bmjopenquality.bmj.com/highwire/filestream/136144/field_highwire_adjunct_files/0/ds4978.docx)
Supplement: ds4978.docx [file ds4978.docx]

**Table 1- Results**

|  | **Medicines reconciled** | **Follow up documented** | **Diagnosis coded** | **Overall bundle compliance** |
| --- | --- | --- | --- | --- |
| **Baseline measurement n=5** | 40% | 40% | 20% | 20% |
| **PDSA 1 n=3** | 100% | 100% | 67% | 67% |
| **PDSA 2 n=3** | 100% | 100% | 100% | 100% |
| **PDSA 3 n=4** | 100% | 100% | 100% | 100% |
